# Supplementary material
Source: HighWire-hosted journal article supplement (https://www.cmaj.ca/highwire/filestream/59052/field_highwire_adjunct_files/0/inter-coulthart-1-at.pdf)
Supplement: inter-coulthart-1-at.pdf [file inter-coulthart-1-at.pdf]

## Appendix 1 (as supplied by the authors): Supporting concepts and data

### I. Basic principles of evidence-based diagnosis

The central principle of evidence-based diagnosis is the progressive revision of diagnostic opinion (defined as the probability of presence or absence of a particular condition or class of conditions), using at each step an estimate of initial diagnostic probability, results of an investigation, and an estimate of the investigation's discriminatory power to calculate a post-investigation probability. Although most clinical or pathological observations and investigations can be interpreted within this framework, it is particularly well suited to laboratory tests.

Pre-test diagnostic probabilities may be based on expert opinion or, more objectively, on an estimate of the target condition's prevalence in the clinical population to which the patient belongs. For inherently binary investigation results (*e.g.*, presence or absence of a clinical sign), or quantitative test results scored as positive or negative above or below a defined threshold, a standard  $2 \times 2$  table summarizes disease status *versus* test result:

| Result   | Disease             |                     | Total       |
|----------|---------------------|---------------------|-------------|
|          | Present             | Absent              |             |
| Positive | True Positive (TP)  | False Positive (FP) | TP+FP       |
| Negative | False Negative (FN) | True Negative (TN)  | FN+TN       |
| Total    | TP+FN               | FP+TN               | TP+FP+TN+FN |

A test's *sensitivity* (Se, or the true-positive rate) is defined as  $TP/(TP+FP)$ , and *specificity* (Sp, or the true-negative rate) as  $TN/(TN+FN)$ . Both of these measures express test accuracy in terms of probability of a particular test result, given disease status. In clinical practice however, exactly the reverse is sought; *i.e.*, probability of disease status given a test result.

A more immediately applicable measure of test accuracy is the *likelihood ratio* (LR), defined as the ratio of probabilities for presence *versus* absence of disease, given a particular test result. It is customary to define a *positive LR* (LR+) as  $Se / (1-Sp)$ , in other words, the ratio of the true-positive rate to the false-positive rate; and a *negative LR* (LR-) as  $(1-Se) / Sp$ , which is the ratio of the false-negative rate to the true-negative rate. LR+ values of 1–2, 2–5, 5–10 and  $> 10$ , or LR- values of 0.5–1, 0.2–0.5, 0.1–0.2 and  $< 0.1$ , represent clinically non-useful, low, moderate and high discriminatory power respectively. These scales facilitate comparisons of utility among tests, including those based on different underlying principles.

The key relationship linking these concepts to practical clinical decision-making is *Bayes' Theorem*, most simply stated as:  $\text{Post-test Odds} = \text{Pre-test Odds} \times \text{LR}$ . To use the more intuitive language of probabilities (usually expressed as percentages or decimal fractions), odds and probabilities are readily interconvertible, using the formulas  $\text{Odds} = \text{Probability} / 1 - \text{Probability}$ ; and  $\text{Probability} = \text{Odds} / \text{Odds} + 1$ . Bayes' Theorem can be applied sequentially as more information about a patient's condition becomes available.

## **II. Surveillance case definitions for sporadic CJD**

### **Definite:**

Progressive neurological disorder + neuropathological confirmation of one or more of

- spongiform degeneration in cortical and/or subcortical grey matter
- positive immunocytochemistry for deposits of abnormal PrP
- positive immunoassay (Western blot) for protease-resistant PrP

### **Probable:**

Progressive dementia of < 2 years' duration + two or more of I + one or more of II

### **Possible:**

Progressive dementia of < 2 years' duration + two or more of I

I.

- A. Myoclonus
- B. Visual disturbance or cerebellar dysfunction (ataxia)
- C. Pyramidal or extrapyramidal features
- D. Akinetic mutism

II.

- A. Periodic (ca. 1–2 Hz) sharp-wave complexes on EEG
- B. Positive CSF 14-3-3 assay
- C. High signal abnormalities in caudate nucleus and putamen in either DWI or FLAIR magnetic resonance imaging

### **III. Primary data, test performance characteristics and methodological features of reviewed studies<sup>1-13</sup>**

The goal of the review was to assess published evidence on the diagnostic accuracies of 14-3-3, tau and S100B proteins in relation to sporadic CJD. The search was restricted to peer-reviewed journal articles published in English as of December 31, 2012. Initially, 339 literature citations were retrieved from the National Library of Medicine's online MEDLINE® database (PubMed), using the search profile: ("14-3-3"[All fields] OR "tau"[All fields] OR "S100B"[All fields]) AND ("CJD"[All fields] OR "Creutzfeldt-Jakob"[All Fields]) AND ("CSF"[All fields] OR "cerebrospinal"[All Fields]). Additional selection criteria were as follows:

- One or more of 14-3-3, tau and S100B were studied;
- The study was conducted on a prospectively recruited patient cohort, with intake based on a pre-test clinical suspicion of sporadic CJD;
- It was possible to retrieve or reconstruct 2 × 2 tables of disease status (present/absent) × test result (positive/negative) using a single intermediate test-scoring threshold – however defined, and with or without additional scoring methods;
- Overlap between the patient cohort on which the study was based with those of other published studies could be confidently excluded; in some cases this judgement required exclusion of earlier studies among several published by the same research group;
- Two smaller studies meeting the above criteria but including only 10 and 13 sporadic CJD patients respectively, were also excluded.

On this basis 13 articles were selected for review, comprising studies by expert centres in 15 different countries and data from a total of 15,814 CSF protein tests (10,131 for 14-3-3; 3,525 for tau; 2,158 for S100B). The data presented in these articles, estimates of basic test performance characteristics, and study characteristics are summarized below.

**Table A1: Primary data and test performance characteristics<sup>a,b,c</sup>**

| <b>Study<sup>d</sup></b> | <b>Marker</b> | <b>sCJD</b> | <b>nCJD</b> | <b>N</b> | <b>DCJD</b> | <b>TP</b> | <b>FN</b> | <b>FP</b> | <b>TN</b> | <b>Se</b><br><b>[95% CI]</b> | <b>Sp</b><br><b>[95% CI]</b> | <b>LR+</b><br><b>[95% CI]</b> | <b>LR-</b><br><b>[95% CI]</b> |
|--------------------------|---------------|-------------|-------------|----------|-------------|-----------|-----------|-----------|-----------|------------------------------|------------------------------|-------------------------------|-------------------------------|
| <b>1</b>                 | 14-3-3        | 1457        | 1089        | 2546     | NA          | 1240      | 217       | 169       | 920       | 0.85<br>[0.83–0.87]          | 0.84<br>[0.82–0.87]          | 5.5<br>[4.8–6.3]              | 0.18<br>[0.16–0.20]           |
|                          | tau           | 819         | 220         | 1039     | NA          | 704       | 115       | 26        | 194       | 0.86<br>[0.83–0.88]          | 0.88<br>[0.83–0.92]          | 7.3<br>[5.1–10.4]             | 0.16<br>[0.13–0.19]           |
|                          | S100B         | 589         | 162         | 751      | NA          | 483       | 106       | 39        | 123       | 0.82<br>[0.79–0.85]          | 0.76<br>[0.68–0.82]          | 3.4<br>[2.6–04.5]             | 0.24<br>[0.20–0.28]           |
| <b>2</b>                 | 14-3-3        | 30          | 41          | 71       | 30          | 26        | 4         | 9         | 32        | 0.97<br>[0.81–1.00]          | 0.78<br>[0.62–0.89]          | 4.4<br>[2.5–7.9]              | 0.04<br>[0.01–0.30]           |
|                          | tau           | 30          | 41          | 71       | 30          | 27        | 3         | 2         | 39        | 0.90<br>[0.72–0.97]          | 0.95<br>[0.82–0.99]          | 18.5<br>[4.7–71.7]            | 0.11<br>[0.04–0.31]           |
|                          | S100B         | 30          | 41          | 71       | 30          | 28        | 2         | 3         | 38        | 0.93<br>[0.76–0.99]          | 0.93<br>[0.79–0.98]          | 12.8<br>[4.3–38.1]            | 0.07<br>[0.02–0.28]           |
| <b>3</b>                 | 14-3-3        | 245         | 171         | 416      | 245         | 210       | 35        | 44        | 127       | 0.86<br>[0.81–0.90]          | 0.74<br>[0.67–0.80]          | 3.3<br>[2.6–4.3]              | 0.19<br>[0.14–0.26]           |
|                          | tau           | 216         | 135         | 351      | 216         | 175       | 41        | 20        | 115       | 0.81<br>[0.75–0.86]          | 0.85<br>[0.78–0.91]          | 5.5<br>[3.6–8.2]              | 0.22<br>[0.17–0.29]           |
|                          | S100B         | 243         | 169         | 412      | 243         | 158       | 85        | 17        | 152       | 0.65<br>[0.59–0.71]          | 0.90<br>[0.84–0.94]          | 6.5<br>[4.1–10.2]             | 0.39<br>[0.33–0.46]           |
| <b>4</b>                 | 14-3-3        | 127         | 873         | 1000     | 127         | 112       | 15        | 244       | 629       | 0.88<br>[0.81–0.93]          | 0.72<br>[0.69–0.75]          | 3.1<br>[2.8–3.6]              | 0.16<br>[0.10–0.26]           |
|                          | tau           | 120         | 826         | 946      | 120         | 109       | 11        | 99        | 727       | 0.91<br>[0.84–0.95]          | 0.88<br>[0.85–0.90]          | 7.4<br>[6.9–7.8]              | 0.10<br>[0.06–0.20]           |
|                          | S100B         | 122         | 802         | 924      | 122         | 106       | 16        | 104       | 698       | 0.87<br>[0.80–0.92]          | 0.87<br>[0.84–0.89]          | 6.5<br>[4.1–10.2]             | 0.15<br>[0.09–0.20]           |
| <b>5</b>                 | 14-3-3        | 52          | 198         | 250      | 47          | 49        | 3         | 7         | 191       | 0.94<br>[0.83–0.98]          | 0.96<br>[0.93–0.98]          | 26.7<br>[12.8–55.3]           | 0.06<br>[0.02–0.18]           |
|                          | tau           | 52          | 198         | 250      | 47          | 45        | 7         | 5         | 193       | 0.87<br>[0.74–0.94]          | 0.97<br>[0.94–0.99]          | 34.7<br>[14.3–82.0]           | 0.14<br>[0.07–0.28]           |
| <b>6</b>                 | 14-3-3        | 40          | 135         | 175      | 0           | 31        | 9         | 24        | 111       | 0.78<br>[0.69–0.81]          | 0.82<br>[0.74–0.88]          | 4.4<br>[2.9–6.5]              | 0.27<br>[0.17–0.49]           |
|                          | tau           | 40          | 135         | 175      | 0           | 36        | 4         | 8         | 127       | 0.90<br>[0.75–0.97]          | 0.94<br>[0.88–0.97]          | 15.2<br>[7.7–30.0]            | 0.11<br>[0.04–0.27]           |
| <b>7</b>                 | 14-3-3        | 53          | 417         | 470      | 0           | 41        | 12        | 70        | 347       | 0.77<br>[0.63–0.87]          | 0.83<br>[0.79–0.87]          | 4.6<br>[3.6–6.0]              | 0.27<br>[0.17–0.45]           |
|                          | tau           | 30          | 243         | 273      | 0           | 25        | 5         | 17        | 226       | 0.83<br>[0.65–0.94]          | 0.93<br>[0.89–0.96]          | 11.9<br>[7.3–19.4]            | 0.18<br>[0.08–0.40]           |

**Table A1 (continued)**

| Study | Marker | sCJD | nCJD | N    | DCJD | TP  | FN | FP  | TN   | Se<br>[95% CI]      | Sp<br>[95% CI]      | LR+<br>[95% CI]      | LR-<br>[95% CI]     |
|-------|--------|------|------|------|------|-----|----|-----|------|---------------------|---------------------|----------------------|---------------------|
| 8     | 14-3-3 | 245  | 175  | 420  | 245  | 221 | 24 | 105 | 70   | 0.58<br>[0.53–0.63] | 0.40<br>[0.33–0.48] | 1.5<br>[1.3–1.7]     | 0.24<br>[0.16–0.36] |
|       | tau    | 245  | 175  | 420  | 245  | 213 | 32 | 57  | 118  | 0.87<br>[0.82–0.91] | 0.67<br>[0.60–0.74] | 2.7<br>[2.1–3.3]     | 0.19<br>[0.14–0.27] |
| 9     | 14-3-3 | 33   | 77   | 110  | 25   | 32  | 1  | 10  | 67   | 0.97<br>[0.82–1.00] | 0.87<br>[0.77–0.93] | 7.5<br>[4.2–13.4]    | 0.03<br>[0.01–0.24] |
| 10    | 14-3-3 | 30   | 68   | 98   | 21   | 28  | 2  | 5   | 63   | 0.93<br>[0.76–0.99] | 0.93<br>[0.83–0.97] | 12.7<br>[5.4–29.7]   | 0.07<br>[0.02–0.28] |
| 11    | 14-3-3 | 63   | 84   | 147  | 41   | 59  | 4  | 2   | 82   | 0.94<br>[0.84–0.98] | 0.98<br>[0.91–1.00] | 39.3<br>[10.0–154.9] | 0.06<br>[0.03–0.17] |
| 12    | 14-3-3 | 365  | 3391 | 3756 | 365  | 315 | 50 | 254 | 3137 | 0.86<br>[0.82–0.90] | 0.93<br>[0.92–0.93] | 11.5<br>[10.2–13.1]  | 0.15<br>[0.11–0.19] |
| 13    | 14-3-3 | 177  | 495  | 672  | 75   | 155 | 22 | 15  | 480  | 0.88<br>[0.82–0.92] | 0.97<br>[0.95–0.98] | 28.9<br>[17.5–47.7]  | 0.13<br>[0.09–0.19] |

<sup>a</sup> **Abbreviations:**

sCJD : Number of sporadic CJD cases

nCJD : Number of non-CJD cases

N : Study size (sCJD + nCJD)

DCJD : Number of definite (neuropathologically confirmed) sporadic CJD cases

NA : Data not available

TP : Number of true positive test results

FN : Number of false negative test results

FP : Number of false positive test results

TN : Number of true negative test results

Se : Sensitivity  $[TP / (TP+FN)]$

Sp : Specificity  $[TN / (FP+TN)]$

LR+ : Positive likelihood ratio  $[Se / (1-Sp)]$

LR- : Negative likelihood ratio  $[(1-Se) / Sp]$

95% CI : 95% Confidence interval (2-sided)

<sup>b</sup> Data were analyzed using MedCalc® for Windows version 12.4.0.0 (MedCalc Software, Mariakerke, Belgium), and statistical calculators available on the Vassar Stats website.<sup>14</sup>

<sup>c</sup> Two smaller studies including 13 and 10 CJD patients respectively were excluded from further consideration.<sup>15,16</sup>

<sup>d</sup> Studies are denoted by their citation number in the reference list.

**Table A2: Methodological features**

| Study | Marker | Cutoff                                            | Assay materials                                        | Method for selection of cutoff threshold                                                                   |
|-------|--------|---------------------------------------------------|--------------------------------------------------------|------------------------------------------------------------------------------------------------------------|
| 1     | 14-3-3 | Not quantified; standards not specified           | Primary antibody: primarily SC-629 <sup>a</sup>        | Empirical; weak positive results scored as negative                                                        |
|       | tau    | 1300 pg/mL                                        | hTau ELISA <sup>b</sup>                                | Maximization of Youden Index (= Sensitivity + Specificity – 1) for previously published data <sup>17</sup> |
|       | S100B  | 4.2 ng/mL<br>0.5 ng/mL                            | Sangtec ELISA <sup>c</sup><br>In-house ELISA (UK data) | Not specified                                                                                              |
| 2     | 14-3-3 | Not quantified; CSF standards                     | Primary antibody: SC-1657 <sup>d</sup>                 | Not specified                                                                                              |
|       | tau    | 1203 pg/mL                                        | hTau ELISA                                             | Receiver Operating Characteristic (ROC) analysis of study data                                             |
|       | S100B  | 2.59 ng/mL                                        | Sangtec ELISA                                          | Receiver Operating Characteristic (ROC) analysis of study data                                             |
| 3     | 14-3-3 | Not quantified; CSF standards                     | Primary antibody: not stated                           | Empirical; weak-positive results scored as negative                                                        |
|       | tau    | 1260 pg/mL                                        | hTau ELISA                                             | Receiver Operating Characteristic (ROC) analysis of previously published data <sup>15</sup>                |
|       | S100B  | 0.5 ng/mL                                         | In-house ELISA                                         | Not stated                                                                                                 |
| 4     | 14-3-3 | ~ 1.5 ng/lane recombinant 14-3-3 $\gamma$ protein | Primary antibody: SC-1657                              | Empirical; results scored as positive or negative with respect to recombinant protein standard             |
|       | tau    | 976 pg/mL                                         | hTau ELISA                                             | Receiver Operating Characteristic (ROC) analysis of study data                                             |
|       | S100B  | 2.5 ng/mL                                         | Sangtec ELISA                                          | Receiver Operating Characteristic (ROC) analysis of study data                                             |
| 5     | 14-3-3 | Not quantified; brain homogenate standard         | Primary antibody: SC-718 <sup>e</sup>                  | Empirical; different scoring thresholds used; weak-positive results scored as negative for present review  |
|       | tau    | 1300 pg/mL                                        | hTau ELISA                                             | Maximization of Youden Index (= Sensitivity + Specificity – 1) for previously published data <sup>17</sup> |
| 6     | 14-3-3 | Not quantified; brain homogenate standard         | Primary antibody: SC-629                               | Not specified                                                                                              |
|       | tau    | 1400 pg/mL                                        | hTau ELISA                                             | Receiver Operating Characteristic (ROC) analysis of study data                                             |

**Table A2 (continued)**

|           |        |                                                             |                          |                                                                                                                                                                            |
|-----------|--------|-------------------------------------------------------------|--------------------------|----------------------------------------------------------------------------------------------------------------------------------------------------------------------------|
| <b>7</b>  | 14-3-3 | Not quantified;<br>standards not<br>specified               | Primary antibody: SC-629 | Empirical; different scoring thresholds used; weak<br>positive results scored as negative                                                                                  |
|           | tau    | 1000 pg/mL                                                  | hTau ELISA               | Receiver Operating Characteristic (ROC) analysis<br>of previously published data <sup>15</sup>                                                                             |
| <b>8</b>  | 14-3-3 | ~100 ng/mL,<br>~ 200 ng/mL,<br>~ 300 ng/mL CSF<br>standards | Primary antibody: SC-629 | Empirical; different scoring thresholds used; weak<br>positive results scored as negative for present<br>review (“Single decision point” model in original<br>publication) |
|           | tau    | 1150 pg/mL                                                  | TAU ELISA <sup>f</sup>   | Graphical method: tau level at which histograms of<br>CJD and non-CJD results intersect                                                                                    |
| <b>9</b>  | 14-3-3 | Not quantified;<br>brain homogenate<br>and CSF<br>standards | Primary antibody: SC-629 | Not specified                                                                                                                                                              |
| <b>10</b> | 14-3-3 | Not quantified;<br>CSF standards                            | Primary antibody: SC-629 | Not specified                                                                                                                                                              |
| <b>11</b> | 14-3-3 | Not quantified;<br>CSF standards                            | Primary antibody: SC-629 | Not specified                                                                                                                                                              |
| <b>12</b> | 14-3-3 | Not quantified;<br>CSF standards                            | Primary antibody: SC-629 | Not specified                                                                                                                                                              |
| <b>13</b> | 14-3-3 | Not quantified;<br>CSF standards                            | Primary antibody: SC-629 | Empirical; weak-positive results scored as negative                                                                                                                        |

**Notes**

<sup>a</sup> Anti-14-3-3 $\beta$  rabbit polyclonal, Santa Cruz Biotechnology, Santa Cruz, CA, USA

<sup>b</sup> Innostest® hTau AG ELISA kit, Innogenetics, Ghent, Belgium

<sup>c</sup> Sangtec® 100 ELISA, Diasorin, Saluggia, Italy

<sup>d</sup> Anti-14-3-3 $\beta$  mouse monoclonal, Santa Cruz Biotechnology, Santa Cruz, CA, USA

<sup>e</sup> Anti-14-3-3 $\gamma$  rabbit polyclonal, Santa Cruz Biotechnology, Santa Cruz, CA, USA

<sup>f</sup> Novex® TAU (Total) Human ELISA, Life Technologies, Carlsbad, CA, USA

#### IV. Meta-analyses of sensitivity and specificity

Meta-analyses of sensitivity and specificity were performed with the software OpenMeta[Analyst],<sup>18</sup> using a random-effects method<sup>19</sup> to derive pooled point and interval estimates of sensitivity and specificity for 14-3-3 and tau proteins (13 and 8 included studies, respectively). Estimators of between-study heterogeneity ( $\tau^2$ ,  $Q$  and  $I^2$ ) were also calculated. Based on these results, significant heterogeneity [ $p(Q) < 0.01$ ] was observed between studies for estimates of specificity for both markers, but not for sensitivity. In addition, the proportion of between-study heterogeneity in specificity not attributable to sampling variation ( $I^2$ ) was  $> 90\%$  for both markers, suggesting underlying differences in composition of study populations, technical factors, or both.

Results of meta-analyses are shown below in Table A3, and in Figures A1 and A2. Note also that another recent meta-analysis of 9 studies of diagnostic accuracy for 14-3-3 yielded meta-estimates of 0.92 [0.90–0.94] for sensitivity and 0.80 [0.77–0.83] for specificity.<sup>20</sup>

**Table A3: Meta-estimates of sensitivity and specificity for 14-3-3 and tau<sup>a</sup>**

| Marker | Metric      | Estimate [95% CI] | $\tau^2$ | $Q$ [df]    | $p(Q)$   | $I^2$ |
|--------|-------------|-------------------|----------|-------------|----------|-------|
| 14-3-3 | Sensitivity | 0.87 [0.85–0.89]  | 0.04     | 20.45 [12]  | 0.06     | 0.41  |
|        | Specificity | 0.87 [0.79–0.92]  | 0.87     | 531.14 [12] | $< 0.01$ | 0.98  |
| tau    | Sensitivity | 0.86 [0.84–0.88]  | 0.01     | 7.81 [7]    | 0.34     | 0.11  |
|        | Specificity | 0.90 [0.84–0.94]  | 0.54     | 84.10 [7]   | $< 0.01$ | 0.92  |

<sup>a</sup> **Abbreviations**

$\tau^2$  : Variance of study estimates

$Q$  : Total weighted sum of squares of study estimates

df : Degrees of freedom (= number of studies – 1)

$p(Q)$  : Significance level for rejection of  $H_0$ :  $Q = df - 1$

(study samples all drawn from the same underlying population, and tested with identically performing methods)

$I^2$  : Proportion of between-study heterogeneity not attributable to sampling variation



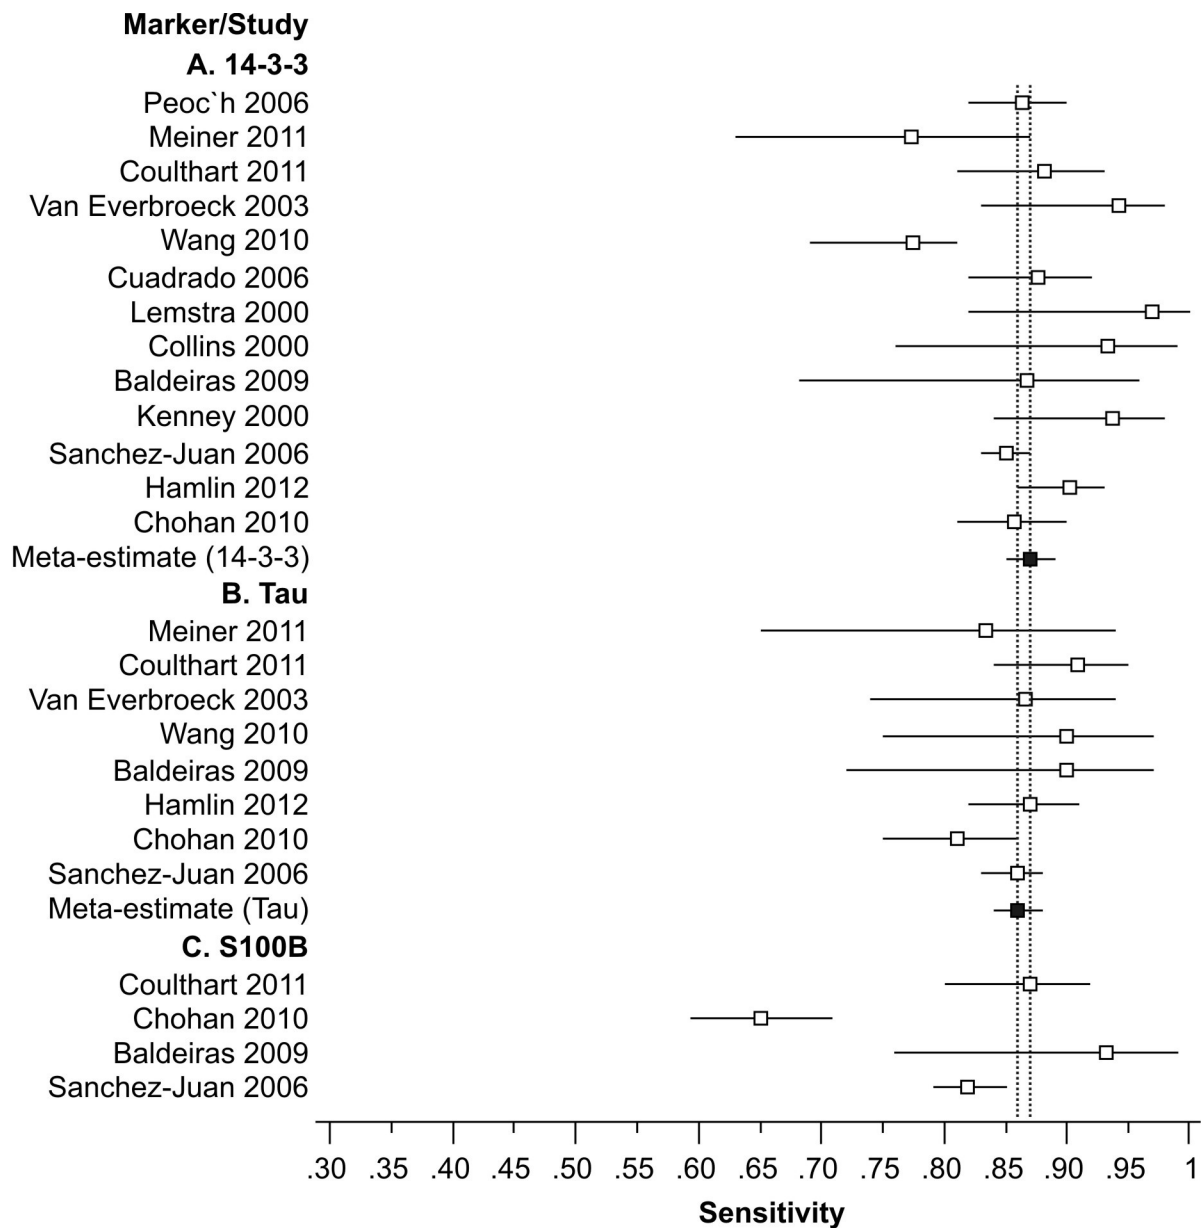

**Figure A1:** Diagnostic sensitivities of 14-3-3, tau and S100B proteins reported by 13 individual studies (open squares), and meta-estimates of sensitivity based on these data (closed squares and vertical dashed lines). Studies are listed by first author and year of publication at left, with results grouped by marker as labeled at right. 95% confidence intervals are indicated by horizontal bars.

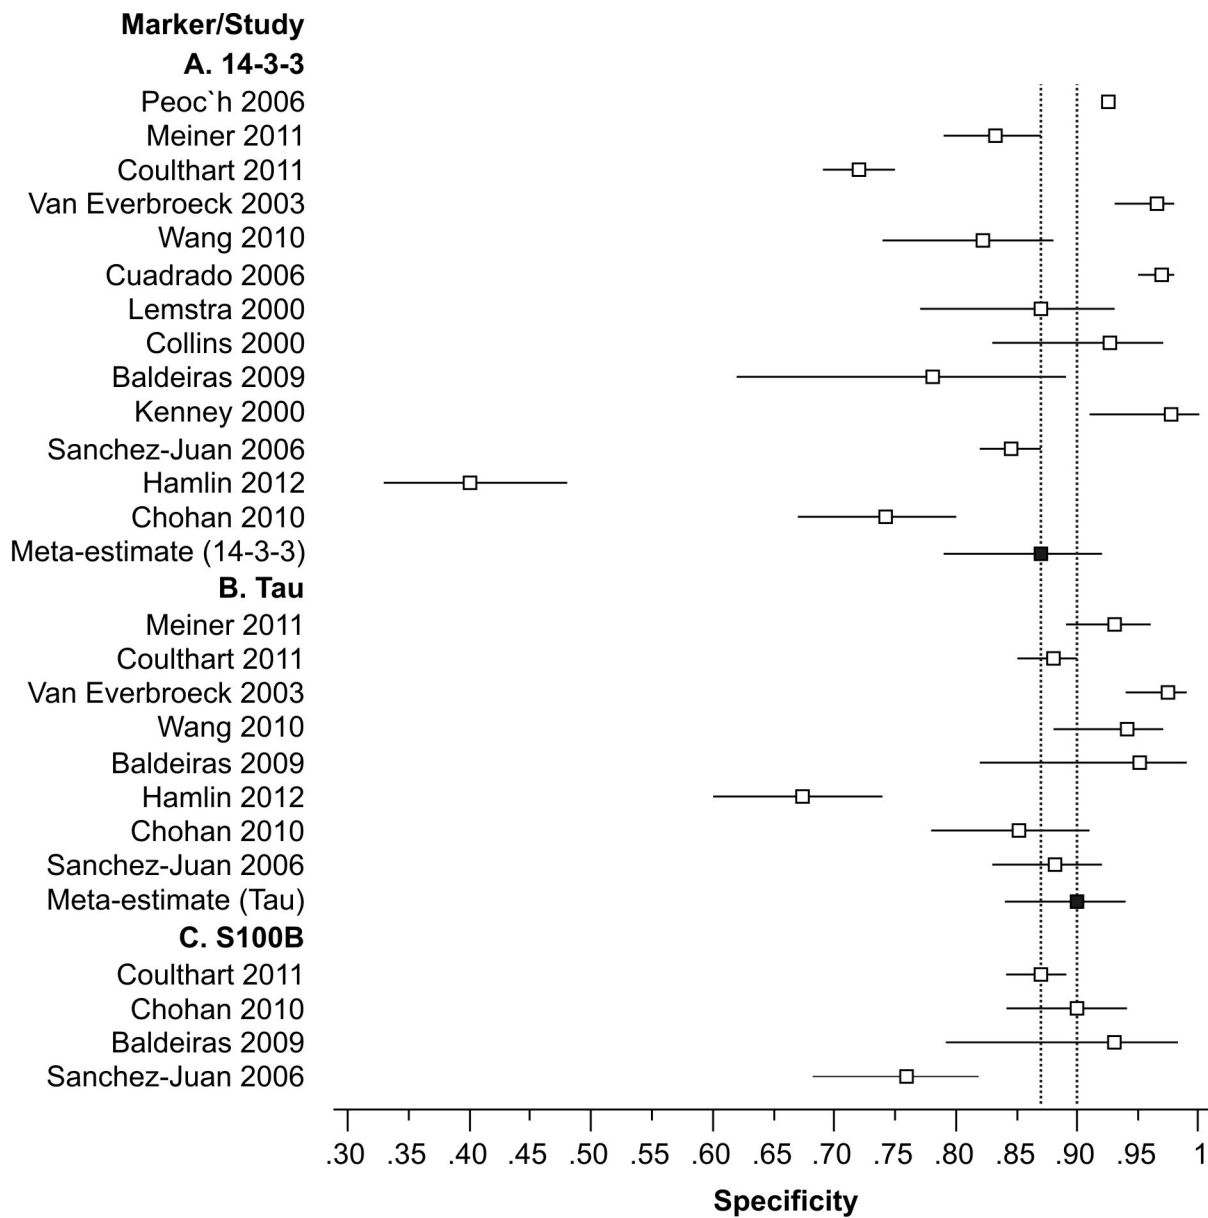

**Figure A2:** Diagnostic specificity of 14-3-3, tau and S100B proteins reported by 13 individual studies (open squares), and meta-estimates of specificity based on these data (closed squares and vertical dashed lines). Studies are listed by first author and year of publication at left, with results grouped by marker as labeled at right. 95% confidence intervals are indicated by horizontal bars.

## V. Supplementary references

1. Sanchez-Juan P, Green A, Ladogana A et al. CSF tests in the differential diagnosis of Creutzfeldt-Jakob disease. *Neurology* 2006;67(4):637-643.
2. Baldeiras IE, Ribeiro MH, Pacheco P et al. Diagnostic value of CSF protein profile in a Portuguese population of sCJD patients. *J Neurol* 2009;256(9):1540-1550.
3. Chohan G, Pennington C, Mackenzie JM et al. The role of cerebrospinal fluid 14-3-3 and other proteins in the diagnosis of sporadic Creutzfeldt-Jakob disease in the UK: a 10-year review. *J Neurol Neurosurg Psychiatry* 2010;81(11):1243-1248.
4. Coulthart MB, Jansen GH, Olsen E et al. Diagnostic accuracy of cerebrospinal fluid protein markers for sporadic Creutzfeldt-Jakob disease in Canada: a 6-year prospective study. *BMC Neurol* 2011;11:133.
5. Van Everbroeck B, Quoilin S, Boons J et al. A prospective study of CSF markers in 250 patients with possible Creutzfeldt-Jakob disease. *J Neurol Neurosurg Psychiatry* 2003;74(9):1210-1214.
6. Wang GR, Gao C, Shi Q et al. Elevated levels of tau protein in cerebrospinal fluid of patients with probable Creutzfeldt-Jakob disease. *Am J Med Sci* 2010;340(4):291-295.
7. Meiner Z, Kahana E, Baitcher F et al. Tau and 14-3-3 of genetic and sporadic Creutzfeldt-Jakob disease patients in Israel. *J Neurol* 2011;258(2):255-262.
8. Hamlin C, Puoti G, Berri S et al. A comparison of tau and 14-3-3 protein in the diagnosis of Creutzfeldt-Jakob disease. *Neurology* 2012;79(6):547-552.
9. Lemstra AW, van Meegen MT, Vreyling JP et al. 14-3-3 testing in diagnosing Creutzfeldt-Jakob disease: a prospective study in 112 patients. *Neurology* 2000;55(4):514-516.
10. Collins S, Boyd A, Fletcher A et al. Creutzfeldt-Jakob disease: diagnostic utility of 14-3-3 protein immunodetection in cerebrospinal fluid. *J Clin Neurosci* 2000;7(3):203-208.
11. Kenney K, Brechtel C, Takahashi H et al. An enzyme-linked immunosorbent assay to quantify 14-3-3 proteins in the cerebrospinal fluid of suspected Creutzfeldt-Jakob disease patients. *Ann Neurol* 2000;48(3):395-398.
12. Peoc'h K, Delasnerie-Laupretre N, Beaudry P, Laplanche JL. Diagnostic value of CSF 14-3-3 detection in sporadic CJD diagnosis according to the age of the patient. *Eur J Neurol* 2006;13(4):427-428.
13. Cuadrado-Corrales N, Jimenez-Huete A, Albo C et al. Impact of the clinical context on the 14-3-3 test for the diagnosis of sporadic CJD. *BMC Neurol* 2006;6:25.
14. Vassar Stats: Website for statistical computation. <http://faculty.vassar.edu/lowry/VassarStats>. ed. 2010.
15. Satoh K, Shirabe S, Eguchi H et al. 14-3-3 protein, total tau and phosphorylated tau in cerebrospinal fluid of patients with Creutzfeldt-Jakob disease and neurodegenerative disease in Japan. *Cell Mol Neurobiol* 2006;26(1):45-52.
16. Skinningsrud A, Stenset V, Gundersen AS, Fladby T. Cerebrospinal fluid markers in Creutzfeldt-Jakob disease. *Cerebrospinal Fluid Res* 2008;5:14.

17. Otto M, Wiltfang J, Cepek L et al. Tau protein and 14-3-3 protein in the differential diagnosis of Creutzfeldt-Jakob disease. *Neurology* 2002;58(2):192-197.
18. Wallace BC, Schmid CH, Lau J, Trikalinos TA. Meta-Analyst: software for meta-analysis of binary, continuous and diagnostic data. *BMC Med Res Methodol* 2009;9:80-2288-9-80.
19. DerSimonian R, Laird N. Meta-analysis in clinical trials *Control Clin Trials* 1986;7(3):177-188.
20. Muayqil T, Gronseth G, Camicioli R. Evidence-based guideline: diagnostic accuracy of CSF 14-3-3 protein in sporadic Creutzfeldt-Jakob disease: report of the guideline development subcommittee of the American Academy of Neurology. *Neurology* 2012;79(14):1499-1506.
